# Supplementary material for: Metabolic and genetic response to probiotics supplementation in patients with diabetic nephropathy: a randomized, double-blind, placebo-controlled trial
Source: Royal Society of Chemistry journal article supplement (doi:10.1039/c8fo00888d), 2018-01-01
Supplement: c8fo00888d1.pdf [file c8fo00888d1.pdf]

**Supplemental file 1.** Mean dietary intakes of study participants at weeks 1, 5, 9 and 12 of the study<sup>1</sup>

|                     | Placebo group<br>(n=30) | Probiotic group<br>(n=30) | P <sup>2</sup> |
|---------------------|-------------------------|---------------------------|----------------|
| Energy (kcal/d)     | 2201±282                | 2196±286                  | 0.94           |
| Carbohydrates (g/d) | 298.1±47.3              | 290.3±54.8                | 0.55           |
| Protein (g/d)       | 85.0±23.1               | 81.1±15.9                 | 0.44           |
| Fat (g/d)           | 77.8±14.5               | 83.1±11.9                 | 0.12           |
| SFA (g/d)           | 24.6±4.2                | 24.3±4.3                  | 0.77           |
| PUFA (g/d)          | 24.1±6.8                | 25.2±4.0                  | 0.45           |
| MUFA (g/d)          | 21.8±5.8                | 23.8±5.8                  | 0.17           |
| Cholesterol (mg/d)  | 207.8±128.9             | 230.1±141.7               | 0.52           |
| TDF (g/d)           | 18.0±3.9                | 19.3±4.6                  | 0.24           |

<sup>1</sup> Data are means± SDs.

<sup>2</sup> Obtained from independent *t*-test.

MUFA, monounsaturated fatty acid; PUFA, polyunsaturated fatty acid; SFA, saturated fatty acid; TDF, total dietary fiber.
